# Supplementary material
Source: PubMed Central journal article supplement (PMC11131845)
Supplement: 18_2008_8587_MOESM1_ESM.pdf [file 18_2008_8587_MOESM1_ESM.pdf]

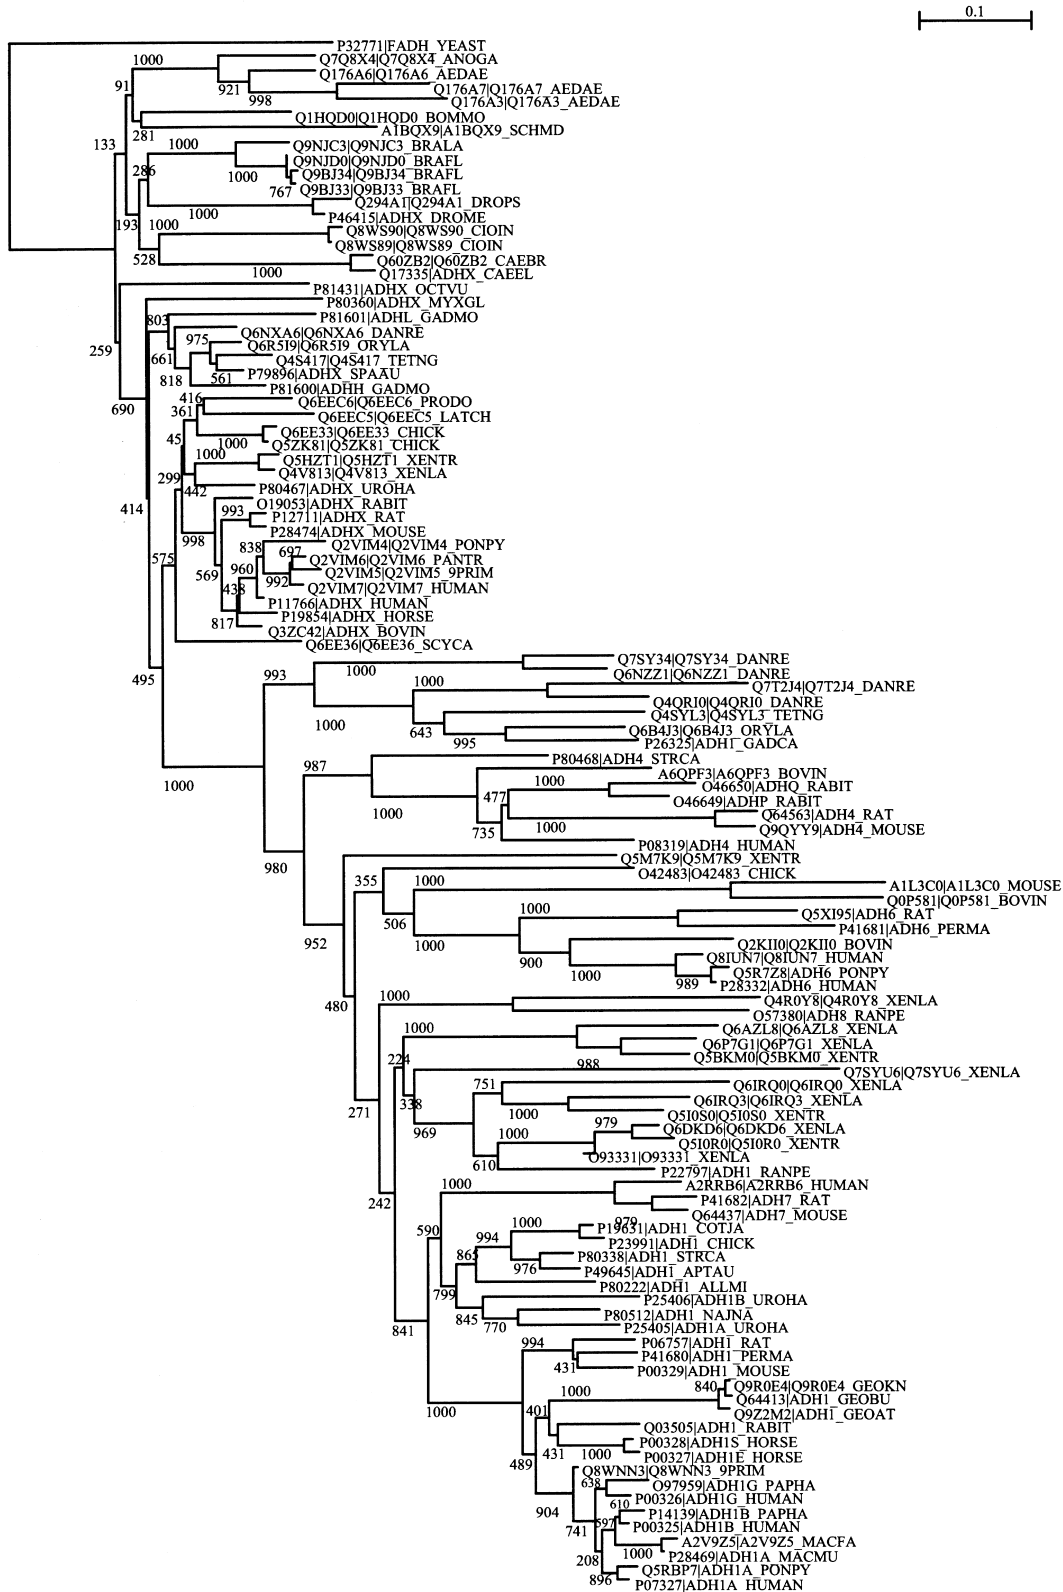

**Figure 2.** Dendrogram of animal ADH forms. Tree drawn using the NJPlot program [113]. Numbers represent bootstrap values from 1000 randomisations. Labels show the UniProt names. Distance bar represents 10% amino acid residue difference.
